# Supplementary material for: The Fml1-MHF complex suppresses inter-fork strand annealing in fission yeast
Source: eLife. 2019 Dec 19;8:e49784. doi: 10.7554/eLife.49784 (PMC6952179; doi:10.7554/eLife.49784)
Supplement: Supplementary file 2. [file elife-49784-supp2.docx]

**Supplementary File 2:** List of *S. pombe* strains used in this study (in order of appearance)

| Strain | Mating type | Genotype | Source |
| --- | --- | --- | --- |
| MCW8020 | *h+* | *ade6-M375 int*::*pUC8/2000 bp spacer/his3+/RTS1-AO/ade6-L469 ura4-D18 his3-D1 leu1-32 arg3-D4* | (Morrow et al., 2017) |
| MCW8300 | *h+* | *fml1*∆::*natMX4 ade6-M375 int*::*pUC8/2000 bp spacer/his3+/RTS1-AO/ade6-L469 ura4-D18 his3-D1 leu1-32 arg3-D4* | (Morrow et al., 2017) |
| MCW9268 | *h+* | *fml1*∆::*fml1*D196N-*natMX4 ade6-M375 int*::*pUC8/2000 bp spacer/his3+/RTS1-AO/ade6-L469 ura4-D18 his3-D1 leu1-32 arg3-D4* | This study |
| MCW9281 | *h+* | *fml1*∆::*fml1*K99R-*natMX4 ade6-M375 int*::*pUC8/2000 bp spacer/his3+/RTS1-AO/ade6-L469 ura4-D18 his3-D1 leu1-32 arg3-D4* | This study |
| MCW9266 | *h+* | *fml1*∆::*fml1*∆C1-603- *natMX4 ade6-M375 int*::*pUC8/2000 bp spacer/his3+/RTS1-AO/ade6-L469 ura4-D18 his3-D1 leu1-32 arg3-D4* | This study |
| MCW8296 | *h?* | *rad51*∆::*arg3+ ade6-M375 int*::*pUC8/2000 bp spacer/his3+/RTS1-AO/ade6-L469 ura4-D18 his3-D1 leu1-32 arg3-D4* | This study |
| MCW9496 | *h-* | *fml1*∆::*natMX4 rad51*∆::*arg3+ ade6-M375 int*::*pUC8/2000 bp spacer/his3+/RTS1-AO/ade6-L469 ura4-D18 his3-D1 leu1-32 arg3-D4* | This study |
| MCW1221 | *h+* | *ura4-D18 his3-D1 leu1-32 arg3-D4* | Lab strain |
| MCW2080 | *h+* | *fml1*∆::*natMX4 ura4-D18 his3-D1 leu1-32 arg3-D4* | (Sun et al., 2008) |
| MCW6923 | *h+* | *fml1*∆::*fml1*∆C1-603- *natMX4 ura4-D18 his3-D1 leu1-32 arg3-D4* | This study |
| MCW6976 | *h+* | *fml1*∆::*fml1*AAA-*natMX4 ura4-D18 his3-D1 leu1-32 arg3-D4* | This study |
| MCW5677 | *h+* | *mhf2*∆::*mhf2+*-*kanMX6 ura4-D18 his3-D1 leu1-32 arg3-D4* | This study |
| MCW5112 | *h+* | *mhf2*∆::*natMX4 ura4-D18 his3-D1 leu1-32 arg3-D4* | This study |
| MCW6376 | *h+* | *mhf2*∆::*mhf2*S59A-*kanMX6 ura4-D18 his3-D1 leu1-32 arg3-D4* | This study |
| MCW6379 | *h+* | *mhf2*∆::*mhf2*Q83A-*kanMX6 ura4-D18 his3-D1 leu1-32 arg3-D4* | This study |
| MCW6367 | *h-* | *mhf2*∆::*mhf2*D87A-*kanMX6 ura4-D18 his3-D1 leu1-32 arg3-D4* | This study |
| FO808 | *h-* | *ura4-D18 his3-D1 leu1-32 arg3-D4* | Lab strain |
| MCW4708 | *h-* | *fml1*∆::*hphMX4 ura4-D18 his3-D1 leu1-32 arg3-D4* | This study |
| MCW6319 | *h-* | *mhf2*∆::*mhf2*D87A-*kanMX6 ura4-D18 his3-D1 leu1-32 arg3-D4*  *ade6-M210/M216* | This study |
| MCW6570 | *h-* | *fml1*∆::*hphMX4 mhf2*∆::*mhf2*D87A-*kanMX6 ura4-D18 his3-D1 leu1-32 arg3-D4 ade6-M210/M216* | This study |
| MCW5846 | *h+* | *mhf1*∆::*mhf1*-*GFP-kanMX6 mis6*∆::*mis6+*-*mCherry-ura4+ ura4-D18 leu1-32 his3-D1 arg3-D4* | (Bhattacharjee et al., 2013) |
| MCW6845 | *h+* | *mhf2*∆:: *natMX4 mhf1*∆::*mhf1*-*GFP-kanMX6 mis6*∆::*mis6+*-*mCherry-ura4+ ura4-D18 leu1-32 his3-D1 arg3-D4* | This study |
| MCW6884 | *h-* | *mhf2*∆::*mhf2*D87A-*hphMX4 mhf1*∆::*mhf1*-*GFP-kanMX6 mis6*∆::*mis6+*-*mCherry-ura4+ ura4-D18 leu1-32 his3-D1 arg3-D4* | This study |
| MCW5963 | *h+* | *fml1*∆::*hphMX4 mhf1*∆::*mhf1*-*GFP-kanMX6 mis6*∆::*mis6+*-*mCherry-ura4+ ura4-D18 leu1-32 his3-D1 arg3-D4* | (Bhattacharjee et al., 2013) |
| MCW6321 | *h+* | *mhf2*∆::*mhf2*D87A-*kanMX6 ura4-D18 his3-D1 leu1-32 arg3-D4* | This study |
| MCW7057 | *h+* | *fml1*∆::*fml1*AAA-*natMX4 mhf2*∆::*mhf2*D87A-*kanMX6 ura4-D18 his3-D1 leu1-32 arg3-D4* | This study |
| MCW9616 | *h-* | *fml1*∆::*fml1*+-*13Myc*-*natMX4 mhf1*∆::*mhf1*-*GFP-kanMX6 ura4-D18 leu1-32 his3-D1 arg3-D4* | This study |
| MCW9593 | *h-* | *fml1*∆::*fml1*+-*13Myc*-*natMX4 mhf1*∆::*mhf1*-*GFP-kanMX6 mhf2*∆::*mhf2*D87A-*hphMX4 ura4-D18 leu1-32 his3-D1 arg3-D4* | This study |
| MCW9594 | *h-* | *fml1*∆::*fml1*AAA-*13Myc*-*natMX4 mhf1*∆::*mhf1*-*GFP-kanMX6 ura4-D18 leu1-32 his3-D1 arg3-D4* | This study |
| MCW9595 | *h-* | *fml1*∆::*fml1*AAA-*13Myc*-*natMX4 mhf1*∆::*mhf1*-*GFP-kanMX6 mhf2*∆::*mhf2*D87A-*hphMX4 ura4-D18 leu1-32 his3-D1 arg3-D4* | This study |
| MCW9220 | *h+* | *mhf2*∆::*mhf2*D87A-*kanMX6 ade6-M375 int*::*pUC8/2000 bp spacer/his3+/RTS1-AO/ade6-L469 ura4-D18 his3-D1 leu1-32 arg3-D4* | This study |
| MCW9283 | *h+* | *fml1*∆::*fml1*AAA-*natMX4 ade6-M375 int*::*pUC8/2000 bp spacer/his3+/RTS1-AO/ade6-L469 ura4-D18 his3-D1 leu1-32 arg3-D4* | This study |
| MCW9269 | *h+* | *mhf2*∆::*mhf2*D87A-*kanMX6 fml1*∆::*fml1*AAA-*natMX4 ade6-M375 int*::*pUC8/2000 bp spacer/his3+/RTS1-AO/ade6-L469 ura4-D18 his3-D1 leu1-32 arg3-D4* | This study |
| MCW4406 | *h+* | *fml1*∆::*fml1*+-*13Myc*-*natMX4 ura4-D18 leu1-32 his3-D1 arg3-D4* | (Bhattacharjee et al., 2013) |
| MCW6977 | *h-* | *fml1*∆::*fml1*∆C-*13Myc*-*natMX4 ura4-D18 leu1-32 his3-D1 arg3-D4* | This study |
| MCW6980 | *h+* | *fml1*∆::*fml1*AAA-*13Myc*-*natMX4 ura4-D18 leu1-32 his3-D1 arg3-D4* | This study |
